# Supplementary material for: Interindividual Variation in the Relationship of Different Intensity Markers—A Challenge for Targeted Training Prescriptions
Source: PubMed Central journal article supplement (PMC5082935; doi:10.1371/journal.pone.0165010), 2016-10-27
Supplement: pone.0165010.s001.pdf [file pone.0165010.s001.pdf]

## Baseline characteristics

| <b>n</b> | <b>type of sport</b><br>rb=1, mb=2, tri=3 | <b>age</b><br>[y] | <b>height</b><br>[cm] | <b>weight</b><br>[kg] | <b>BMI</b><br>[kg/m <sup>2</sup> ] | <b>VO<sub>2peak</sub></b><br>[ml·min <sup>-1</sup> ·kg <sup>-1</sup> ] |
|----------|-------------------------------------------|-------------------|-----------------------|-----------------------|------------------------------------|------------------------------------------------------------------------|
| 1        | 2                                         | 31                | 188                   | 78.5                  | 22.2                               | 67.4                                                                   |
| 2        | 1                                         | 27                | 183                   | 87.9                  | 26.2                               | 56.0                                                                   |
| 3        | 2                                         | 23                | 179                   | 71.2                  | 22.2                               | 71.5                                                                   |
| 4        | 3                                         | 33                | 184                   | 73.1                  | 21.6                               | 59.4                                                                   |
| 5        | 2                                         | 25                | 173                   | 70.9                  | 23.7                               | 65.0                                                                   |
| 6        | 3                                         | 26                | 183                   | 87.6                  | 26.2                               | 67.0                                                                   |
| 7        | 2                                         | 25                | 189                   | 81.6                  | 22.8                               | 66.5                                                                   |
| 8        | 3                                         | 24                | 178                   | 70.4                  | 22.2                               | 76.0                                                                   |
| 9        | 1                                         | 26                | 172                   | 65.5                  | 22.1                               | 67.7                                                                   |
| 10       | 1                                         | 24                | 183                   | 72.4                  | 21.6                               | 67.7                                                                   |
| 11       | 2                                         | 18                | 173                   | 62.9                  | 21.0                               | 79.9                                                                   |
| 12       | 1                                         | 27                | 179                   | 71.0                  | 22.2                               | 60.8                                                                   |
| 13       | 1                                         | 25                | 182                   | 70.0                  | 21.1                               | 56.7                                                                   |
| 14       | 3                                         | 21                | 180                   | 72.8                  | 22.5                               | 73.4                                                                   |
| 15       | 1                                         | 25                | 183                   | 70.0                  | 20.9                               | 68.4                                                                   |

rb = racing bike; mb = mountainbike; tri = triathlon

## Incremental exercise test

| n  | HR <sub>rest</sub><br>[bpm] | HR <sub>max</sub><br>[bpm] | HR <sub>R</sub><br>[bpm] | P <sub>max</sub><br>[W] | P <sub>max</sub><br>[W·kg <sup>-1</sup> ] | VO <sub>2peak</sub><br>[ml·min <sup>-1</sup> ] | VO <sub>2peak</sub><br>[ml·min <sup>-1</sup> ·kg <sup>-1</sup> ] | BLa <sub>rest</sub><br>[mmol·l <sup>-1</sup> ] | BLa <sub>max</sub><br>[mmol·l <sup>-1</sup> ] | IAT<br>[W·kg <sup>-1</sup> ] | IAT<br>[W] |
|----|-----------------------------|----------------------------|--------------------------|-------------------------|-------------------------------------------|------------------------------------------------|------------------------------------------------------------------|------------------------------------------------|-----------------------------------------------|------------------------------|------------|
| 1  | 72                          | 185                        | 113                      | 425                     | 5.3                                       | 5301                                           | 67.1                                                             | 0.8                                            | 12.9                                          | 4.2                          | 330        |
| 2  | 64                          | 198                        | 134                      | 392                     | 4.5                                       | 4824                                           | 56.0                                                             | 0.6                                            | 13.9                                          | 3.2                          | 285        |
| 3  | 92                          | 202                        | 110                      | 417                     | 5.7                                       | 5178                                           | 71.5                                                             | 0.9                                            | 14.3                                          | 4.2                          | 298        |
| 4  | 85                          | 186                        | 101                      | 400                     | 5.1                                       | 4358                                           | 59.4                                                             | 0.9                                            | 14.2                                          | 3.9                          | 286        |
| 5  | 57                          | 188                        | 131                      | 375                     | 5.2                                       | 4697                                           | 65.0                                                             | 1.1                                            | 10.9                                          | 4.0                          | 284        |
| 6  | 56                          | 188                        | 132                      | 450                     | 5.1                                       | 5857                                           | 67.0                                                             | 0.5                                            | 9.8                                           | 3.7                          | 328        |
| 7  | 67                          | 180                        | 113                      | 425                     | 5.3                                       | 5355                                           | 66.5                                                             | 1.3                                            | 14.3                                          | 3.6                          | 295        |
| 8  | 52                          | 187                        | 135                      | 408                     | 5.7                                       | 5375                                           | 76.0                                                             | 1.0                                            | 14.0                                          | 4.2                          | 297        |
| 9  | 74                          | 188                        | 114                      | 350                     | 5.3                                       | 4454                                           | 67.7                                                             | 0.7                                            | 13.3                                          | 3.4                          | 224        |
| 10 | 50                          | 182                        | 132                      | 400                     | 5.5                                       | 4881                                           | 67.7                                                             | 0.8                                            | 13.8                                          | 4.0                          | 293        |
| 11 | 61                          | 196                        | 135                      | 375                     | 6.0                                       | 5019                                           | 79.9                                                             | 0.8                                            | 11.3                                          | 4.5                          | 283        |
| 12 | 62                          | 190                        | 128                      | 325                     | 4.6                                       | 4301                                           | 60.8                                                             | 0.6                                            | 13.4                                          | 3.2                          | 224        |
| 13 | 107                         | 218                        | 111                      | 283                     | 4.0                                       | 3972                                           | 56.7                                                             | 0.8                                            | 14.4                                          | 2.9                          | 203        |
| 14 | 85                          | 186                        | 101                      | 400                     | 5.4                                       | 5396                                           | 73.4                                                             | 0.6                                            | 15.5                                          | 4.1                          | 300        |
| 15 | 72                          | 191                        | 119                      | 191                     | 5.5                                       | 4744                                           | 68.4                                                             | 0.6                                            | 14.4                                          | 4.1                          | 285        |

HR<sub>rest</sub> = heart rate at rest; HR<sub>max</sub> = maximum heart rate; HR<sub>R</sub> = heart rate reserve; P<sub>max</sub> = maximum performance; VO<sub>2peak</sub> = peak oxygen consumption

BLa<sub>rest</sub> = blood lactate concentration at rest; BLa<sub>max</sub> = blood lactate concentration at exhaustion; IAT = individual anaerobic threshold

**Constant load test (lowest workload below IAT)**

IAT = individual anaerobic threshold

| n  | workload<br>[W] | HR <sub>rest</sub><br>[bpm] | HR 10min<br>[bpm] | HR 20min<br>[bpm] | HR 30min<br>[bpm] | HR 40min<br>[bpm] | HR 50min<br>[bpm] | HR 60min<br>[bpm] | HR <sub>mean</sub><br>[bpm] | % HR <sub>max</sub><br>[%] |
|----|-----------------|-----------------------------|-------------------|-------------------|-------------------|-------------------|-------------------|-------------------|-----------------------------|----------------------------|
| 1  | 200             | 62                          | 126               | 125               | 126               | 129               | 133               | 129               | 128                         | 69                         |
| 2  | 150             | 53                          | 100               | 102               | 101               | 102               | 102               | 102               | 102                         | 51                         |
| 3  | 150             | 63                          | 120               | 116               | 119               | 120               | 121               | 118               | 119                         | 59                         |
| 4  | 150             | 82                          | 111               | 110               | 109               | 113               | 113               | 115               | 112                         | 60                         |
| 5  | 150             | 61                          | 120               | 116               | 114               | 116               | 112               | 114               | 115                         | 61                         |
| 6  | 200             | 61                          | 120               | 120               | 115               | 115               | 115               | 116               | 117                         | 62                         |
| 7  | 200             | 64                          | 117               | 120               | 121               | 123               | 124               | 128               | 122                         | 68                         |
| 8  | 150             | 58                          | 115               | 121               | 116               | 118               | 116               | 120               | 118                         | 63                         |
| 9  | 100             | 62                          | 97                | 95                | 95                | 90                | 91                | 95                | 94                          | 50                         |
| 10 | 200             | 53                          | 121               | 126               | 131               | 127               | 125               | 127               | 126                         | 69                         |
| 11 | 150             | 56                          | 113               | 114               | 116               | 113               | 113               | 114               | 114                         | 58                         |
| 12 | 100             | 72                          | 102               | 103               | 106               | 103               | 104               | 108               | 104                         | 55                         |
| 13 | 100             | 88                          | 142               | 144               | 140               | 140               | 141               | 143               | 142                         | 65                         |
| 14 | 200             | 63                          | 122               | 120               | 116               | 118               | 121               | 122               | 120                         | 64                         |
| 15 | 150             | 75                          | 121               | 117               | 117               | 118               | 119               | 119               | 119                         | 62                         |

HR<sub>rest</sub> = heart rate at rest; HR 10min-60min = heart rate at respective time; HR<sub>mean</sub> = mean heart rate%HR<sub>max</sub> = percentage of maximum heart rate

## Constant load test (lowest workload below IAT)

IAT = individual anaerobic threshold

| n  | BLa <sub>rest</sub><br>[mmol·l <sup>-1</sup> ] | BLa 10min<br>[mmol·l <sup>-1</sup> ] | BLa 20min<br>[mmol·l <sup>-1</sup> ] | BLa 30min<br>[mmol·l <sup>-1</sup> ] | BLa 40min<br>[mmol·l <sup>-1</sup> ] | BLa 50min<br>[mmol·l <sup>-1</sup> ] | BLa 60min<br>[mmol·l <sup>-1</sup> ] | BLa <sub>mean</sub><br>[mmol·l <sup>-1</sup> ] |
|----|------------------------------------------------|--------------------------------------|--------------------------------------|--------------------------------------|--------------------------------------|--------------------------------------|--------------------------------------|------------------------------------------------|
| 1  | 0.9                                            | 0.6                                  | 0.6                                  | 0.6                                  | 0.6                                  | 0.5                                  | 0.5                                  | 0.6                                            |
| 2  | 0.7                                            | 1.2                                  | 0.8                                  | 1.1                                  | 1.0                                  | 0.7                                  | 0.5                                  | 0.9                                            |
| 3  | 0.9                                            | 1.2                                  | 1.0                                  | 1.3                                  | 1.2                                  | 1.1                                  | 1.1                                  | 1.1                                            |
| 4  | 1.2                                            | 1.0                                  | 1.0                                  | 0.9                                  | 1.1                                  | 1.3                                  | 0.6                                  | 1.0                                            |
| 5  | 1.0                                            | 1.5                                  | 1.1                                  | 0.7                                  | 0.8                                  | 1.1                                  | 0.6                                  | 1.0                                            |
| 6  | 1.0                                            | 0.7                                  | 1.0                                  | 1.0                                  | 1.2                                  | 1.0                                  | 1.2                                  | 1.0                                            |
| 7  | 0.7                                            | 0.9                                  | 0.7                                  | 0.5                                  | 0.7                                  | 0.7                                  | 0.5                                  | 0.7                                            |
| 8  | 1.1                                            | 1.1                                  | 0.9                                  | 0.8                                  | 0.8                                  | 0.9                                  | 1.0                                  | 0.9                                            |
| 9  | 0.7                                            | 0.5                                  | 0.6                                  | 0.7                                  | 0.7                                  | 0.7                                  | 0.6                                  | 0.6                                            |
| 10 | 0.9                                            | 1.1                                  | 1.2                                  | 1.0                                  | 0.8                                  | 0.7                                  | 0.6                                  | 0.9                                            |
| 11 | 0.7                                            | 0.5                                  | 0.5                                  | 1.3                                  | 0.5                                  | 0.6                                  | 0.6                                  | 0.7                                            |
| 12 | 1.0                                            | 0.8                                  | 0.9                                  | 0.9                                  | 0.8                                  | 0.6                                  | 0.8                                  | 0.8                                            |
| 13 | 0.8                                            | 1.0                                  | 0.8                                  | 0.6                                  | 0.7                                  | 0.7                                  | 0.6                                  | 0.7                                            |
| 14 | 1.3                                            | 0.7                                  | 1.0                                  | 0.7                                  | 0.8                                  | 0.7                                  | 1.0                                  | 0.8                                            |
| 15 | 0.7                                            | 0.6                                  | 0.5                                  | 0.5                                  | 0.5                                  | 0.5                                  | 0.6                                  | 0.5                                            |

BLa<sub>rest</sub> = blood lactate concentration at rest; BLa 10min-60min = blood lactate concentration at respective time;

BLa<sub>mean</sub> = mean blood lactate concentration

**Constant load test (lowest workload below IAT)**

IAT = individual anaerobic threshold

| n  | VO <sub>2rest</sub><br>[ml·min <sup>-1</sup> ·kg <sup>-1</sup> ] | VO <sub>2 10min</sub><br>[ml·min <sup>-1</sup> ·kg <sup>-1</sup> ] | VO <sub>2 20min</sub><br>[ml·min <sup>-1</sup> ·kg <sup>-1</sup> ] | VO <sub>2 30min</sub><br>[ml·min <sup>-1</sup> ·kg <sup>-1</sup> ] | VO <sub>2 40min</sub><br>[ml·min <sup>-1</sup> ·kg <sup>-1</sup> ] | VO <sub>2 50min</sub><br>[ml·min <sup>-1</sup> ·kg <sup>-1</sup> ] | VO <sub>2 60min</sub><br>[ml·min <sup>-1</sup> ·kg <sup>-1</sup> ] | VO <sub>2mean</sub><br>[ml·min <sup>-1</sup> ·kg <sup>-1</sup> ] | %VO <sub>2peak</sub><br>[ml·min <sup>-1</sup> ·kg <sup>-1</sup> ] |
|----|------------------------------------------------------------------|--------------------------------------------------------------------|--------------------------------------------------------------------|--------------------------------------------------------------------|--------------------------------------------------------------------|--------------------------------------------------------------------|--------------------------------------------------------------------|------------------------------------------------------------------|-------------------------------------------------------------------|
| 1  | 8.8                                                              | 38.8                                                               | 36.7                                                               | 35.8                                                               | 36.7                                                               | 31.2                                                               | 33.5                                                               | 35.4                                                             | 53                                                                |
| 2  | 6.6                                                              | 25.9                                                               | 26.2                                                               | 24.2                                                               | 24.7                                                               | 25.9                                                               | 25.1                                                               | 25.3                                                             | 45                                                                |
| 3  | 5.8                                                              | 31.5                                                               | 32.1                                                               | 33.0                                                               | 30.6                                                               | 29.2                                                               | 31.0                                                               | 31.2                                                             | 44                                                                |
| 4  | 6.9                                                              | 27.7                                                               | 28.8                                                               | 27.3                                                               | 28.9                                                               | 30.4                                                               | 28.2                                                               | 28.6                                                             | 48                                                                |
| 5  | 7.5                                                              | 37.8                                                               | 37.6                                                               | 36.4                                                               | 36.1                                                               | 35.5                                                               | 35.8                                                               | 36.5                                                             | 56                                                                |
| 6  | 5.3                                                              | 34.1                                                               | 32.8                                                               | 33.8                                                               | 33.9                                                               | 31.8                                                               | 31.0                                                               | 32.9                                                             | 49                                                                |
| 7  | 9.5                                                              | 34.1                                                               | 34.2                                                               | 33.2                                                               | 33.3                                                               | 34.6                                                               | 35.4                                                               | 34.1                                                             | 51                                                                |
| 8  | 6.5                                                              | 34.5                                                               | 35.6                                                               | 32.8                                                               | 32.4                                                               | 31.2                                                               | 33.2                                                               | 33.3                                                             | 44                                                                |
| 9  | 7.7                                                              | 26.2                                                               | 28.2                                                               | 27.1                                                               | 24.3                                                               | 23.7                                                               | 24.3                                                               | 25.6                                                             | 38                                                                |
| 10 | 7.1                                                              | 38.1                                                               | 39.1                                                               | 43.1                                                               | 40.4                                                               | 40.5                                                               | 37.9                                                               | 39.9                                                             | 59                                                                |
| 11 | 7.8                                                              | 34.5                                                               | 37.0                                                               | 34.2                                                               | 36.2                                                               | 34.2                                                               | 35.0                                                               | 35.2                                                             | 44                                                                |
| 12 | 6.1                                                              | 26.1                                                               | 26.9                                                               | 25.8                                                               | 24.6                                                               | 26.4                                                               | 25.2                                                               | 25.8                                                             | 42                                                                |
| 13 | 4.4                                                              | 25.6                                                               | 24.9                                                               | 24.8                                                               | 24.5                                                               | 22.2                                                               | 25.6                                                               | 24.6                                                             | 43                                                                |
| 14 | 7.8                                                              | 41.9                                                               | 40.3                                                               | 41.0                                                               | 41.8                                                               | 42.9                                                               | 39.7                                                               | 41.3                                                             | 56                                                                |
| 15 | 7.8                                                              | 30.1                                                               | 30.5                                                               | 32.0                                                               | 32.9                                                               | 32.2                                                               | 30.9                                                               | 31.4                                                             | 46                                                                |

VO<sub>2rest</sub> = oxygen consumption at rest; VO<sub>2 10min-60min</sub> = oxygen consumption at respective time;

VO<sub>2mean</sub> = mean oxygen consumption; %VO<sub>2peak</sub> = percentage of peak oxygen consumption

## Constant load test (medium workload below IAT)

IAT = individual anaerobic threshold

| n  | workload<br>[W] | HR <sub>rest</sub><br>[bpm] | HR 10min<br>[bpm] | HR 20min<br>[bpm] | HR 30min<br>[bpm] | HR 40min<br>[bpm] | HR 50min<br>[bpm] | HR 60min<br>[bpm] | HR <sub>mean</sub><br>[bpm] | % HR <sub>max</sub><br>[%] |
|----|-----------------|-----------------------------|-------------------|-------------------|-------------------|-------------------|-------------------|-------------------|-----------------------------|----------------------------|
| 1  | 250             | 69                          | 146               | 142               | 141               | 138               | 147               | 144               | 143                         | 77                         |
| 2  | 200             | 57                          | 119               | 125               | 132               | 132               | 132               | 134               | 129                         | 65                         |
| 3  | 200             | 78                          | 130               | 134               | 134               | 132               | 137               | 134               | 134                         | 66                         |
| 4  | 200             | 84                          | 126               | 131               | 128               | 132               | 134               | 130               | 130                         | 70                         |
| 5  | 200             | 51                          | 132               | 131               | 130               | 130               | 131               | 131               | 131                         | 70                         |
| 6  | 250             | 60                          | 131               | 131               | 130               | 130               | 130               | 131               | 131                         | 69                         |
| 7  | 250             | 61                          | 142               | 146               | 146               | 147               | 150               | 149               | 147                         | 81                         |
| 8  | 200             | 62                          | 126               | 128               | 130               | 131               | 134               | 133               | 130                         | 70                         |
| 9  | 150             | 56                          | 142               | 141               | 141               | 141               | 141               | 140               | 141                         | 75                         |
| 10 | 250             | 58                          | 142               | 142               | 142               | 143               | 145               | 143               | 143                         | 78                         |
| 11 | 200             | 55                          | 130               | 130               | 130               | 131               | 131               | 133               | 131                         | 67                         |
| 12 | 150             | 82                          | 121               | 122               | 127               | 128               | 132               | 132               | 127                         | 67                         |
| 13 | 150             | 102                         | 158               | 159               | 163               | 159               | 162               | 161               | 160                         | 74                         |
| 14 | 250             | 75                          | 138               | 142               | 141               | 140               | 139               | 141               | 140                         | 75                         |
| 15 | 200             | 82                          | 142               | 139               | 141               | 141               | 143               | 146               | 142                         | 74                         |

HR<sub>rest</sub> = heart rate at rest; HR 10min-60min = heart rate at respective time; HR<sub>mean</sub> = mean heart rate

%HR<sub>max</sub> = percentage of maximum heart rate

## Constant load test (medium workload below IAT)

IAT = individual anaerobic threshold

| <b>n</b> | <b>BLa<sub>rest</sub></b><br>[mmol·l <sup>-1</sup> ] | <b>BLa 10min</b><br>[mmol·l <sup>-1</sup> ] | <b>BLa 20min</b><br>[mmol·l <sup>-1</sup> ] | <b>BLa 30min</b><br>[mmol·l <sup>-1</sup> ] | <b>BLa 40min</b><br>[mmol·l <sup>-1</sup> ] | <b>BLa 50min</b><br>[mmol·l <sup>-1</sup> ] | <b>BLa 60min</b><br>[mmol·l <sup>-1</sup> ] | <b>BLa<sub>mean</sub></b><br>[mmol·l <sup>-1</sup> ] |
|----------|------------------------------------------------------|---------------------------------------------|---------------------------------------------|---------------------------------------------|---------------------------------------------|---------------------------------------------|---------------------------------------------|------------------------------------------------------|
| 1        | 0.7                                                  | 0.7                                         | 0.7                                         | 0.6                                         | 0.6                                         | 0.7                                         | 0.7                                         | 0.7                                                  |
| 2        | 0.8                                                  | 2.4                                         | 2.0                                         | 2.2                                         | 2.1                                         | 2.0                                         | 1.2                                         | 2.0                                                  |
| 3        | 1.0                                                  | 0.6                                         | 1.1                                         | 1.0                                         | 1.3                                         | 1.3                                         | 0.9                                         | 1.0                                                  |
| 4        | 0.7                                                  | 1.3                                         | 1.3                                         | 1.6                                         | 1.0                                         | 0.6                                         | 0.9                                         | 1.1                                                  |
| 5        | 0.8                                                  | 0.8                                         | 1.0                                         | 0.8                                         | 0.5                                         | 0.6                                         | 0.5                                         | 0.7                                                  |
| 6        | 0.6                                                  | 1.1                                         | 1.2                                         | 1.0                                         | 0.9                                         | 0.8                                         | 1.0                                         | 1.0                                                  |
| 7        | 1.7                                                  | 3.7                                         | 2.3                                         | 1.7                                         | 2.2                                         | 1.9                                         | 1.5                                         | 2.2                                                  |
| 8        | 1.3                                                  | 0.8                                         | 0.8                                         | 0.9                                         | 0.9                                         | 1.0                                         | 0.9                                         | 0.9                                                  |
| 9        | 1.8                                                  | 1.8                                         | 1.5                                         | 1.3                                         | 1.2                                         | 1.2                                         | 1.2                                         | 1.4                                                  |
| 10       | 0.8                                                  | 1.8                                         | 1.3                                         | 1.6                                         | 1.2                                         | 1.3                                         | 1.1                                         | 1.4                                                  |
| 11       | 0.7                                                  | 0.6                                         | 0.5                                         | 0.5                                         | 0.7                                         | 0.6                                         | 0.5                                         | 0.6                                                  |
| 12       | 0.7                                                  | 1.0                                         | 1.1                                         | 1.1                                         | 1.3                                         | 1.2                                         | 1.1                                         | 1.1                                                  |
| 13       | 1.2                                                  | 2.3                                         | 2.9                                         | 2.2                                         | 1.6                                         | 1.7                                         | 1.4                                         | 2.0                                                  |
| 14       | 1.2                                                  | 1.1                                         | 1.4                                         | 1.2                                         | 0.9                                         | 0.9                                         | 1.0                                         | 1.1                                                  |
| 15       | 0.9                                                  | 0.8                                         | 0.7                                         | 0.7                                         | 0.7                                         | 0.8                                         | 0.7                                         | 0.7                                                  |

BLa<sub>rest</sub> = blood lactate concentration at rest; BLa 10min-60min = blood lactate concentration at respective time;

BLa<sub>mean</sub> = mean blood lactate concentration

**Constant load test (medium workload below IAT)**

IAT = individual anaerobic threshold

| n  | VO <sub>2rest</sub><br>[ml·min <sup>-1</sup> ·kg <sup>-1</sup> ] | VO <sub>2 10min</sub><br>[ml·min <sup>-1</sup> ·kg <sup>-1</sup> ] | VO <sub>2 20min</sub><br>[ml·min <sup>-1</sup> ·kg <sup>-1</sup> ] | VO <sub>2 30min</sub><br>[ml·min <sup>-1</sup> ·kg <sup>-1</sup> ] | VO <sub>2 40min</sub><br>[ml·min <sup>-1</sup> ·kg <sup>-1</sup> ] | VO <sub>2 50min</sub><br>[ml·min <sup>-1</sup> ·kg <sup>-1</sup> ] | VO <sub>2 60min</sub><br>[ml·min <sup>-1</sup> ·kg <sup>-1</sup> ] | VO <sub>2mean</sub><br>[ml·min <sup>-1</sup> ·kg <sup>-1</sup> ] | %VO <sub>2peak</sub><br>[ml·min <sup>-1</sup> ·kg <sup>-1</sup> ] |
|----|------------------------------------------------------------------|--------------------------------------------------------------------|--------------------------------------------------------------------|--------------------------------------------------------------------|--------------------------------------------------------------------|--------------------------------------------------------------------|--------------------------------------------------------------------|------------------------------------------------------------------|-------------------------------------------------------------------|
| 1  | 8.6                                                              | 42.7                                                               | 37.2                                                               | 39.1                                                               | 41.2                                                               | 34.7                                                               | 38.7                                                               | 38.9                                                             | 58                                                                |
| 2  | 9.7                                                              | 31.0                                                               | 32.3                                                               | 32.6                                                               | 33.3                                                               | 27.6                                                               | 34.3                                                               | 31.8                                                             | 57                                                                |
| 3  | 7.7                                                              | 39.3                                                               | 43.1                                                               | 38.8                                                               | 41.1                                                               | 41.7                                                               | 35.8                                                               | 40.0                                                             | 56                                                                |
| 4  | 6.3                                                              | 35.5                                                               | 34.9                                                               | 37.1                                                               | 34.0                                                               | 32.5                                                               | 34.3                                                               | 34.7                                                             | 58                                                                |
| 5  | 8.0                                                              | 42.5                                                               | 40.6                                                               | 38.8                                                               | 39.9                                                               | 40.5                                                               | 38.2                                                               | 40.1                                                             | 62                                                                |
| 6  | 7.6                                                              | 39.5                                                               | 37.5                                                               | 40.4                                                               | 37.2                                                               | 34.4                                                               | 37.7                                                               | 37.8                                                             | 56                                                                |
| 7  | 8.8                                                              | 42.9                                                               | 42.1                                                               | 43.9                                                               | 45.1                                                               | 46.1                                                               | 45.4                                                               | 44.2                                                             | 67                                                                |
| 8  | 7.7                                                              | 46.1                                                               | 41.7                                                               | 41.7                                                               | 39.6                                                               | 40.2                                                               | 42.1                                                               | 41.9                                                             | 55                                                                |
| 9  | 7.8                                                              | 36.2                                                               | 35.9                                                               | 34.5                                                               | 36.7                                                               | 34.5                                                               | 34.1                                                               | 35.3                                                             | 52                                                                |
| 10 | 6.9                                                              | 45.6                                                               | 46.7                                                               | 47.8                                                               | 48.3                                                               | 48.2                                                               | 50.1                                                               | 47.8                                                             | 71                                                                |
| 11 | 6.5                                                              | 50.8                                                               | 52.5                                                               | 50.9                                                               | 50.7                                                               | 48.5                                                               | 50.6                                                               | 50.7                                                             | 63                                                                |
| 12 | 6.1                                                              | 31.6                                                               | 31.9                                                               | 33.7                                                               | 33.8                                                               | 34.0                                                               | 35.4                                                               | 33.4                                                             | 55                                                                |
| 13 | 5.7                                                              | 32.6                                                               | 35.0                                                               | 35.6                                                               | 35.9                                                               | 37.1                                                               | 36.9                                                               | 35.5                                                             | 63                                                                |
| 14 | 6.7                                                              | 50.6                                                               | 45.3                                                               | 43.9                                                               | 44.8                                                               | 43.3                                                               | 43.7                                                               | 45.3                                                             | 62                                                                |
| 15 | 7.1                                                              | 42.6                                                               | 43.2                                                               | 43.1                                                               | 43.5                                                               | 43.7                                                               | 41.8                                                               | 43.0                                                             | 63                                                                |

VO<sub>2rest</sub> = oxygen consumption at rest; VO<sub>2 10min-60min</sub> = oxygen consumption at respective time;

VO<sub>2mean</sub> = mean oxygen consumption; %VO<sub>2peak</sub> = percentage of peak oxygen consumption



## Constant load test (highest workload below IAT)

IAT = individual anaerobic threshold

| n  | workload<br>[W] | HR <sub>rest</sub><br>[bpm] | HR 10min<br>[bpm] | HR 20min<br>[bpm] | HR 30min<br>[bpm] | HR 40min<br>[bpm] | HR 50min<br>[bpm] | HR 60min<br>[bpm] | HR <sub>mean</sub><br>[bpm] | % HR <sub>max</sub><br>[%] |
|----|-----------------|-----------------------------|-------------------|-------------------|-------------------|-------------------|-------------------|-------------------|-----------------------------|----------------------------|
| 1  | 300             | 71                          | 157               | 157               | 158               | 157               | 157               | 158               | 157                         | 85                         |
| 2  | 250             | 70                          | 161               | 169               | 177               | 180               | 184               | 186               | 176                         | 89                         |
| 3  | 250             | 89                          | 155               | 151               | 161               | 165               | 164               | 165               | 160                         | 79                         |
| 4  | 250             | 81                          | 157               | 154               | 156               | 157               | 161               | 161               | 158                         | 85                         |
| 5  | 250             | 60                          | 148               | 152               | 151               | 154               | 157               | 157               | 153                         | 81                         |
| 6  | 300             | 78                          | 153               | 159               | 160               | 164               | 161               | 163               | 160                         | 85                         |
| 7  | 300             | 50                          | 153               | 159               | 164               | 168               | 170               | 170               | 164                         | 91                         |
| 8  | 250             | 59                          | 141               | 144               | 148               | 148               | 151               | 153               | 148                         | 79                         |
| 9  | 200             | 61                          | 147               | 150               | 151               | 155               | 154               | 155               | 152                         | 81                         |
| 10 | 300             | 51                          | 166               | 167               | 169               | 169               | 173               | 174               | 170                         | 93                         |
| 11 | 250             | 66                          | 164               | 157               | 158               | 161               | 161               | 160               | 160                         | 82                         |
| 12 | 200             | 71                          | 143               | 148               | 154               | 157               | 161               | 159               | 154                         | 81                         |
| 13 | 200             | 103                         | 193               | 198               | 201               | 202               | 200               | 199               | 199                         | 91                         |
| 14 | 300             | 68                          | 159               | 160               | 166               | 163               | 164               | 162               | 162                         | 87                         |
| 15 | 250             | 81                          | 162               | 166               | 169               | 171               | 173               | 174               | 169                         | 89                         |

HR<sub>rest</sub> = heart rate at rest; HR 10min-60min = heart rate at respective time; HR<sub>mean</sub> = mean heart rate

%HR<sub>max</sub> = percentage of maximum heart rate

## Constant load test (highest workload below IAT)

IAT = individual anaerobic threshold

| n  | BLa <sub>rest</sub><br>[mmol·l <sup>-1</sup> ] | BLa 10min<br>[mmol·l <sup>-1</sup> ] | BLa 20min<br>[mmol·l <sup>-1</sup> ] | BLa 30min<br>[mmol·l <sup>-1</sup> ] | BLa 40min<br>[mmol·l <sup>-1</sup> ] | BLa 50min<br>[mmol·l <sup>-1</sup> ] | BLa 60min<br>[mmol·l <sup>-1</sup> ] | BLa <sub>mean</sub><br>[mmol·l <sup>-1</sup> ] |
|----|------------------------------------------------|--------------------------------------|--------------------------------------|--------------------------------------|--------------------------------------|--------------------------------------|--------------------------------------|------------------------------------------------|
| 1  | 1.1                                            | 1.6                                  | 1.2                                  | 1.0                                  | 1.1                                  | 1.0                                  | 1.0                                  | 1.1                                            |
| 2  | 1.2                                            | 4.0                                  | 3.3                                  | 3.9                                  | 4.8                                  | 4.5                                  | 5.0                                  | 4.2                                            |
| 3  | 0.8                                            | 1.9                                  | 2.1                                  | 2.2                                  | 1.8                                  | 1.5                                  | 1.9                                  | 1.9                                            |
| 4  | 0.9                                            | 4.7                                  | 2.2                                  | 2.7                                  | 2.6                                  | 2.2                                  | 2.1                                  | 2.7                                            |
| 5  | 1.0                                            | 1.0                                  | 0.9                                  | 1.0                                  | 1.0                                  | 1.3                                  | 1.1                                  | 1.0                                            |
| 6  | 1.2                                            | 3.0                                  | 3.1                                  | 2.6                                  | 2.5                                  | 3.0                                  | 3.0                                  | 2.9                                            |
| 7  | 1.1                                            | 4.0                                  | 3.7                                  | 3.7                                  | 3.9                                  | 3.3                                  | 3.0                                  | 3.6                                            |
| 8  | 0.9                                            | 2.1                                  | 2.0                                  | 2.1                                  | 1.7                                  | 1.8                                  | 1.8                                  | 1.9                                            |
| 9  | 1.1                                            | 2.4                                  | 2.7                                  | 2.4                                  | 2.2                                  | 2.1                                  | 2.1                                  | 2.3                                            |
| 10 | 1.0                                            | 5.5                                  | 5.9                                  | 5.4                                  | 6.0                                  | 6.6                                  | 4.5                                  | 5.7                                            |
| 11 | 0.8                                            | 2.1                                  | 1.6                                  | 1.6                                  | 1.4                                  | 1.2                                  | 1.2                                  | 1.5                                            |
| 12 | 1.3                                            | 1.9                                  | 1.9                                  | 2.0                                  | 2.2                                  | 2.1                                  | 1.8                                  | 2.0                                            |
| 13 | 0.7                                            | 6.9                                  | 7.1                                  | 5.6                                  | 5.7                                  | 5.9                                  | 3.9                                  | 5.8                                            |
| 14 | 1.3                                            | 2.7                                  | 3.1                                  | 3.6                                  | 2.4                                  | 2.5                                  | 1.7                                  | 2.7                                            |
| 15 | 0.9                                            | 1.6                                  | 1.7                                  | 1.9                                  | 1.8                                  | 2.1                                  | 2.4                                  | 1.9                                            |

BLa<sub>rest</sub> = blood lactate concentration at rest; BLa 10min-60min = blood lactate concentration at respective time;

BLa<sub>mean</sub> = mean blood lactate concentration

## Constant load test (highest workload below IAT)

IAT = individual anaerobic threshold

| n  | VO <sub>2rest</sub><br>[ml·min <sup>-1</sup> ·kg <sup>-1</sup> ] | VO <sub>2 10min</sub><br>[ml·min <sup>-1</sup> ·kg <sup>-1</sup> ] | VO <sub>2 20min</sub><br>[ml·min <sup>-1</sup> ·kg <sup>-1</sup> ] | VO <sub>2 30min</sub><br>[ml·min <sup>-1</sup> ·kg <sup>-1</sup> ] | VO <sub>2 40min</sub><br>[ml·min <sup>-1</sup> ·kg <sup>-1</sup> ] | VO <sub>2 50min</sub><br>[ml·min <sup>-1</sup> ·kg <sup>-1</sup> ] | VO <sub>2 60min</sub><br>[ml·min <sup>-1</sup> ·kg <sup>-1</sup> ] | VO <sub>2mean</sub><br>[ml·min <sup>-1</sup> ·kg <sup>-1</sup> ] | %VO <sub>2peak</sub><br>[ml·min <sup>-1</sup> ·kg <sup>-1</sup> ] |
|----|------------------------------------------------------------------|--------------------------------------------------------------------|--------------------------------------------------------------------|--------------------------------------------------------------------|--------------------------------------------------------------------|--------------------------------------------------------------------|--------------------------------------------------------------------|------------------------------------------------------------------|-------------------------------------------------------------------|
| 1  | 8.4                                                              | 51.4                                                               | 48.7                                                               | 49.4                                                               | 48.0                                                               | 41.4                                                               | 44.4                                                               | 47.2                                                             | 70                                                                |
| 2  | 9.7                                                              | 40.9                                                               | 37.6                                                               | 41.7                                                               | 44.1                                                               | 38.4                                                               | 40.9                                                               | 40.6                                                             | 73                                                                |
| 3  | 11.0                                                             | 54.3                                                               | 55.5                                                               | 47.5                                                               | 53.5                                                               | 49.5                                                               | 49.9                                                               | 51.7                                                             | 72                                                                |
| 4  | 8.4                                                              | 45.0                                                               | 43.4                                                               | 46.3                                                               | 43.2                                                               | 43.4                                                               | 42.2                                                               | 43.9                                                             | 74                                                                |
| 5  | 6.8                                                              | 48.3                                                               | 52.0                                                               | 52.6                                                               | 47.3                                                               | 46.6                                                               | 48.2                                                               | 49.1                                                             | 76                                                                |
| 6  | 8.9                                                              | 46.8                                                               | 48.7                                                               | 48.4                                                               | 49.3                                                               | 50.4                                                               | 50.1                                                               | 49.0                                                             | 73                                                                |
| 7  | 5.0                                                              | 50.6                                                               | 50.5                                                               | 49.5                                                               | 49.3                                                               | 52.1                                                               | 50.2                                                               | 50.4                                                             | 76                                                                |
| 8  | 4.4                                                              | 49.7                                                               | 51.2                                                               | 52.0                                                               | 52.0                                                               | 48.2                                                               | 49.6                                                               | 50.4                                                             | 66                                                                |
| 9  | 9.6                                                              | 42.9                                                               | 46.3                                                               | 47.4                                                               | 49.0                                                               | 49.0                                                               | 47.1                                                               | 46.9                                                             | 69                                                                |
| 10 | 6.5                                                              | 56.2                                                               | 58.2                                                               | 55.8                                                               | 56.8                                                               | 56.0                                                               | 56.2                                                               | 56.5                                                             | 84                                                                |
| 11 | 8.3                                                              | 54.7                                                               | 55.9                                                               | 56.0                                                               | 53.2                                                               | 54.8                                                               | 53.5                                                               | 54.7                                                             | 68                                                                |
| 12 | 8.2                                                              | 44.9                                                               | 44.6                                                               | 44.2                                                               | 46.8                                                               | 46.5                                                               | 50.1                                                               | 46.2                                                             | 76                                                                |
| 13 | 5.1                                                              | 43.3                                                               | 45.3                                                               | 46.1                                                               | 44.8                                                               | 45.7                                                               | 45.0                                                               | 45.0                                                             | 79                                                                |
| 14 | 9.3                                                              | 62.2                                                               | 58.2                                                               | 64.1                                                               | 58.4                                                               | 57.6                                                               | 56.0                                                               | 59.4                                                             | 81                                                                |
| 15 | 8.3                                                              | 54.1                                                               | 55.6                                                               | 55.4                                                               | 54.1                                                               | 54.4                                                               | 53.9                                                               | 54.6                                                             | 80                                                                |

VO<sub>2rest</sub> = oxygen consumption at rest; VO<sub>2 10min-60min</sub> = oxygen consumption at respective time;

VO<sub>2mean</sub> = mean oxygen consumption; %VO<sub>2peak</sub> = percentage of peak oxygen consumption

## Constant load test (repetition of highest workload below IAT)

IAT = individual anaerobic threshold

| n  | workload<br>[W] | HR <sub>rest</sub><br>[bpm] | HR 10min<br>[bpm] | HR 20min<br>[bpm] | HR 30min<br>[bpm] | HR 40min<br>[bpm] | HR 50min<br>[bpm] | HR 60min<br>[bpm] | HR <sub>mean</sub><br>[bpm] | % HR <sub>max</sub><br>[%] |
|----|-----------------|-----------------------------|-------------------|-------------------|-------------------|-------------------|-------------------|-------------------|-----------------------------|----------------------------|
| 1  | 300             | 68                          | 150               | 153               | 152               | 153               | 155               | 157               | 153                         | 83                         |
| 2  | 250             | 64                          | 150               | 156               | 162               | 164               | 172               | 171               | 163                         | 82                         |
| 3  | 250             | 67                          | 148               | 151               | 152               | 156               | 158               | 157               | 154                         | 76                         |
| 4  | 250             | 71                          | 141               | 143               | 148               | 150               | 151               | 150               | 147                         | 79                         |
| 5  | 250             | 56                          | 144               | 145               | 145               | 149               | 153               | 151               | 148                         | 79                         |
| 6  | 300             | 51                          | 149               | 146               | 152               | 146               | 153               | 154               | 150                         | 80                         |
| 7  | 300             | 62                          | 157               | 162               | 162               | 164               | 168               | 166               | 163                         | 91                         |
| 8  | 250             | 60                          | 140               | 143               | 145               | 146               | 146               | 148               | 145                         | 77                         |
| 9  | 200             | 68                          | 152               | 154               | 155               | 159               | 164               | 161               | 158                         | 84                         |
| 10 | 300             | 74                          | 168               | 172               | 178               | 179               | 180               | 178               | 176                         | 97                         |
| 11 | 250             | 50                          | 149               | 155               | 158               | 163               | 164               | 163               | 159                         | 81                         |
| 12 | 200             | 72                          | 144               | 150               | 153               | 157               | 161               | 164               | 155                         | 81                         |
| 13 | 200             | 94                          | 182               | 186               | 191               | 195               | 197               | 197               | 191                         | 88                         |
| 14 | 300             | 72                          | 156               | 165               | 167               | 170               | 171               | 172               | 167                         | 90                         |
| 15 | 250             | 76                          | 151               | 155               | 160               | 163               | 165               | 166               | 160                         | 84                         |

HR<sub>rest</sub> = heart rate at rest; HR 10min-60min = heart rate at respective time; HR<sub>mean</sub> = mean heart rate  
%HR<sub>max</sub> = percentage of maximum heart rate

## Constant load test (repetition of highest workload below IAT)

IAT = individual anaerobic threshold

| <b>n</b> | <b>BLa<sub>rest</sub></b><br>[mmol·l <sup>-1</sup> ] | <b>BLa 10min</b><br>[mmol·l <sup>-1</sup> ] | <b>BLa 20min</b><br>[mmol·l <sup>-1</sup> ] | <b>BLa 30min</b><br>[mmol·l <sup>-1</sup> ] | <b>BLa 40min</b><br>[mmol·l <sup>-1</sup> ] | <b>BLa 50min</b><br>[mmol·l <sup>-1</sup> ] | <b>BLa 60min</b><br>[mmol·l <sup>-1</sup> ] | <b>BLa<sub>mean</sub></b><br>[mmol·l <sup>-1</sup> ] |
|----------|------------------------------------------------------|---------------------------------------------|---------------------------------------------|---------------------------------------------|---------------------------------------------|---------------------------------------------|---------------------------------------------|------------------------------------------------------|
| 1        | 0.5                                                  | 2.0                                         | 2.0                                         | 1.9                                         | 1.8                                         | 1.6                                         | 1.8                                         | 1.9                                                  |
| 2        | 1.5                                                  | 3.5                                         | 2.9                                         | 2.4                                         | 2.5                                         | 2.2                                         | 5.0                                         | 3.1                                                  |
| 3        | 1.1                                                  | 1.5                                         | 1.7                                         | 1.3                                         | 1.3                                         | 1.1                                         | 1.1                                         | 1.3                                                  |
| 4        | 0.5                                                  | 2.7                                         | 2.2                                         | 3.3                                         | 3.1                                         | 1.4                                         | 1.6                                         | 2.4                                                  |
| 5        | 1.2                                                  | 0.8                                         | 0.9                                         | 0.9                                         | 0.9                                         | 0.9                                         | 1.3                                         | 0.9                                                  |
| 6        | 0.8                                                  | 1.7                                         | 1.5                                         | 1.3                                         | 1.3                                         | 1.1                                         | 1.4                                         | 1.4                                                  |
| 7        | 1.4                                                  | 5.1                                         | 5.4                                         | 4.6                                         | 5.5                                         | 3.8                                         | 3.2                                         | 4.6                                                  |
| 8        | 1.7                                                  | 2.4                                         | 1.7                                         | 1.6                                         | 1.7                                         | 1.2                                         | 1.2                                         | 1.6                                                  |
| 9        | 1.4                                                  | 2.5                                         | 2.5                                         | 2.8                                         | 2.6                                         | 3.2                                         | 3.2                                         | 2.8                                                  |
| 10       | 1.3                                                  | 5.2                                         | 5.9                                         | 6.0                                         | 7.5                                         | 8.8                                         | 8.3                                         | 6.9                                                  |
| 11       | 0.5                                                  | 1.0                                         | 1.4                                         | 0.9                                         | 1.2                                         | 1.1                                         | 0.9                                         | 1.1                                                  |
| 12       | 1.5                                                  | 2.6                                         | 2.6                                         | 2.6                                         | 2.6                                         | 2.4                                         | 2.6                                         | 2.6                                                  |
| 13       | 1.1                                                  | 4.8                                         | 5.7                                         | 6.0                                         | 6.4                                         | 6.7                                         | 7.1                                         | 6.1                                                  |
| 14       | 1.5                                                  | 2.6                                         | 3.1                                         | 3.4                                         | 3.2                                         | 3.0                                         | 2.9                                         | 3.0                                                  |
| 15       | 1.0                                                  | 1.6                                         | 1.8                                         | 2.3                                         | 2.1                                         | 2.2                                         | 1.9                                         | 2.0                                                  |

BLa<sub>rest</sub> = blood lactate concentration at rest; BLa 10min-60min = blood lactate concentration at respective time;

BLa<sub>mean</sub> = mean blood lactate concentration

**Constant load test (repetition of highest workload below IAT)**

IAT = individual anaerobic threshold

| n  | VO <sub>2rest</sub><br>[ml·min <sup>-1</sup> ·kg <sup>-1</sup> ] | VO <sub>2 10min</sub><br>[ml·min <sup>-1</sup> ·kg <sup>-1</sup> ] | VO <sub>2 20min</sub><br>[ml·min <sup>-1</sup> ·kg <sup>-1</sup> ] | VO <sub>2 30min</sub><br>[ml·min <sup>-1</sup> ·kg <sup>-1</sup> ] | VO <sub>2 40min</sub><br>[ml·min <sup>-1</sup> ·kg <sup>-1</sup> ] | VO <sub>2 50min</sub><br>[ml·min <sup>-1</sup> ·kg <sup>-1</sup> ] | VO <sub>2 60min</sub><br>[ml·min <sup>-1</sup> ·kg <sup>-1</sup> ] | VO <sub>2mean</sub><br>[ml·min <sup>-1</sup> ·kg <sup>-1</sup> ] | %VO <sub>2peak</sub><br>[ml·min <sup>-1</sup> ·kg <sup>-1</sup> ] |
|----|------------------------------------------------------------------|--------------------------------------------------------------------|--------------------------------------------------------------------|--------------------------------------------------------------------|--------------------------------------------------------------------|--------------------------------------------------------------------|--------------------------------------------------------------------|------------------------------------------------------------------|-------------------------------------------------------------------|
| 1  | 7.5                                                              | 52.6                                                               | 54.1                                                               | 51.7                                                               | 53.0                                                               | 47.8                                                               | 52.8                                                               | 52.0                                                             | 77                                                                |
| 2  | 7.5                                                              | 39.1                                                               | 40.6                                                               | 40.1                                                               | 41.0                                                               | 43.4                                                               | 42.8                                                               | 41.2                                                             | 73                                                                |
| 3  | 6.2                                                              | 50.8                                                               | 51.1                                                               | 50.6                                                               | 51.5                                                               | 51.4                                                               | 50.5                                                               | 51.0                                                             | 71                                                                |
| 4  | 9.3                                                              | 45.3                                                               | 44.4                                                               | 45.7                                                               | 45.4                                                               | 45.0                                                               | 45.5                                                               | 45.2                                                             | 76                                                                |
| 5  | 6.4                                                              | 47.1                                                               | 47.3                                                               | 46.5                                                               | 48.0                                                               | 47.2                                                               | 49.6                                                               | 47.6                                                             | 73                                                                |
| 6  | 9.5                                                              | 51.2                                                               | 52.0                                                               | 50.5                                                               | 53.3                                                               | 52.6                                                               | 53.5                                                               | 52.2                                                             | 78                                                                |
| 7  | 6.9                                                              | 52.2                                                               | 56.5                                                               | 55.0                                                               | 51.4                                                               | 52.1                                                               | 51.0                                                               | 53.0                                                             | 80                                                                |
| 8  | 7.0                                                              | 46.6                                                               | 46.3                                                               | 32.1                                                               | 47.7                                                               | 46.6                                                               | 47.5                                                               | 44.5                                                             | 59                                                                |
| 9  | 8.4                                                              | 44.9                                                               | 44.2                                                               | 45.4                                                               | 48.5                                                               | 47.6                                                               | 46.3                                                               | 46.2                                                             | 68                                                                |
| 10 | 10.5                                                             | 59.2                                                               | 59.2                                                               | 60.0                                                               | 61.6                                                               | 61.9                                                               | 59.9                                                               | 60.3                                                             | 89                                                                |
| 11 | 6.9                                                              | 57.5                                                               | 58.8                                                               | 58.7                                                               | 57.5                                                               | 59.4                                                               | 59.0                                                               | 58.5                                                             | 73                                                                |
| 12 | 7.9                                                              | 41.7                                                               | 40.3                                                               | 40.0                                                               | 44.4                                                               | 41.4                                                               | 43.6                                                               | 41.9                                                             | 69                                                                |
| 13 | 5.3                                                              | 40.1                                                               | 40.2                                                               | 42.1                                                               | 40.9                                                               | 42.7                                                               | 41.1                                                               | 41.2                                                             | 73                                                                |
| 14 | 7.6                                                              | 64.3                                                               | 59.2                                                               | 58.2                                                               | 59.3                                                               | 60.4                                                               | 59.5                                                               | 60.1                                                             | 82                                                                |
| 15 | 7.5                                                              | 45.2                                                               | 48.8                                                               | 52.2                                                               | 50.1                                                               | 49.8                                                               | 51.5                                                               | 49.6                                                             | 73                                                                |

VO<sub>2rest</sub> = oxygen consumption at rest; VO<sub>2 10min-60min</sub> = oxygen consumption at respective time;

VO<sub>2mean</sub> = mean oxygen consumption; %VO<sub>2peak</sub> = percentage of peak oxygen consumption

**Prediction of blood lactate (predictor: % HR<sub>max</sub> = % heart rate reserve)**

| n  | % HR <sub>max</sub><br>[%] | BLa <sub>observed</sub><br>[mmol·l <sup>-1</sup> ] | IV <sub>equation</sub><br>[mmol·l <sup>-1</sup> ] | Δ IV <sub>equation</sub> -<br>BLa <sub>observed</sub><br>[mmol·l <sup>-1</sup> ] | GB <sub>equation</sub><br>[mmol·l <sup>-1</sup> ] | Δ GB <sub>equation</sub> -<br>BLa <sub>observed</sub><br>[mmol·l <sup>-1</sup> ] | SSD IV<br>[mmol·l <sup>-1</sup> ] | SSD GB<br>[mmol·l <sup>-1</sup> ] |
|----|----------------------------|----------------------------------------------------|---------------------------------------------------|----------------------------------------------------------------------------------|---------------------------------------------------|----------------------------------------------------------------------------------|-----------------------------------|-----------------------------------|
| 1  | 83                         | 1.9                                                | 1.6                                               | -0.3                                                                             | 3.2                                               | 1.3                                                                              | 0.1                               | 1.7                               |
| 2  | 82                         | 3.1                                                | 4.4                                               | 1.3                                                                              | 2.5                                               | -0.5                                                                             | 1.8                               | 0.3                               |
| 3  | 76                         | 1.3                                                | 1.8                                               | 0.5                                                                              | 2.2                                               | 0.9                                                                              | 0.2                               | 0.8                               |
| 4  | 79                         | 2.4                                                | 3.1                                               | 0.7                                                                              | 2.9                                               | 0.6                                                                              | 0.6                               | 0.3                               |
| 5  | 79                         | 0.9                                                | 0.9                                               | -0.1                                                                             | 2.5                                               | 1.5                                                                              | 0.0                               | 2.4                               |
| 6  | 80                         | 1.4                                                | 3.9                                               | 2.5                                                                              | 3.2                                               | 1.8                                                                              | 6.3                               | 3.4                               |
| 7  | 91                         | 4.6                                                | 4.3                                               | -0.3                                                                             | 3.6                                               | -1.1                                                                             | 0.1                               | 1.1                               |
| 8  | 77                         | 1.6                                                | 1.1                                               | -0.6                                                                             | 1.0                                               | -0.6                                                                             | 0.3                               | 0.4                               |
| 9  | 84                         | 2.8                                                | 2.2                                               | -0.6                                                                             | 1.8                                               | -1.0                                                                             | 0.3                               | 0.9                               |
| 10 | 97                         | 6.9                                                | 8.7                                               | 1.8                                                                              | 5.5                                               | -1.4                                                                             | 3.1                               | 2.0                               |
| 11 | 81                         | 1.1                                                | 2.8                                               | 1.7                                                                              | 2.5                                               | 1.4                                                                              | 2.9                               | 2.0                               |
| 12 | 81                         | 2.6                                                | 1.7                                               | -0.9                                                                             | 1.9                                               | -0.6                                                                             | 0.8                               | 0.4                               |
| 13 | 88                         | 6.1                                                | 4.0                                               | -2.1                                                                             | 2.4                                               | -3.7                                                                             | 4.5                               | 13.7                              |
| 14 | 90                         | 3.0                                                | 2.8                                               | -0.3                                                                             | 4.0                                               | 0.9                                                                              | 0.1                               | 0.9                               |
| 15 | 84                         | 2.0                                                | 1.3                                               | -0.7                                                                             | 2.4                                               | 0.4                                                                              | 0.5                               | 0.2                               |

predictor: %HR<sub>max</sub> ; predicted variable: BLa<sub>observed</sub> = blood lactate concentration observed during repetition test;

IV<sub>equation</sub> = individual regression equation; Δ IV<sub>equation</sub> - BLa<sub>observed</sub> = difference between predicted and observed BLa

GB<sub>equation</sub> = group-based regression equation; Δ GB<sub>equation</sub> - BLa<sub>observed</sub> = difference between predicted and observed BLa

SSD IV = sum of squared differences (individual regression); SSD GB = sum of squared differences (group-based regression)

**Prediction of blood lactate (predictor: % HR<sub>R</sub> = % heart rate reserve)**

| n  | % HR <sub>R</sub><br>[%] | BLa <sub>observed</sub><br>[mmol·l <sup>-1</sup> ] | IV <sub>equation</sub><br>[mmol·l <sup>-1</sup> ] | Δ IV <sub>equation</sub> -<br>BLa <sub>observed</sub><br>[mmol·l <sup>-1</sup> ] | GB <sub>equation</sub><br>[mmol·l <sup>-1</sup> ] | Δ GB <sub>equation</sub> -<br>BLa <sub>observed</sub><br>[mmol·l <sup>-1</sup> ] | SSD IV<br>[mmol·l <sup>-1</sup> ] | SSD GB<br>[mmol·l <sup>-1</sup> ] |
|----|--------------------------|----------------------------------------------------|---------------------------------------------------|----------------------------------------------------------------------------------|---------------------------------------------------|----------------------------------------------------------------------------------|-----------------------------------|-----------------------------------|
| 1  | 76                       | 1.9                                                | 1.0                                               | -0.9                                                                             | 2.2                                               | 0.3                                                                              | 0.8                               | 0.1                               |
| 2  | 74                       | 3.1                                                | 3.5                                               | 0.5                                                                              | 2.4                                               | -0.7                                                                             | 0.2                               | 0.5                               |
| 3  | 79                       | 1.3                                                | 1.6                                               | 0.2                                                                              | 1.0                                               | -0.3                                                                             | 0.0                               | 0.1                               |
| 4  | 75                       | 2.4                                                | 1.9                                               | -0.5                                                                             | 1.4                                               | -1.0                                                                             | 0.2                               | 1.0                               |
| 5  | 70                       | 0.9                                                | 0.9                                               | -0.1                                                                             | 2.0                                               | 1.0                                                                              | 0.0                               | 1.0                               |
| 6  | 75                       | 1.4                                                | 1.9                                               | 0.6                                                                              | 3.8                                               | 2.4                                                                              | 0.3                               | 5.8                               |
| 7  | 90                       | 4.6                                                | 3.5                                               | -1.1                                                                             | 3.8                                               | -0.8                                                                             | 1.2                               | 0.7                               |
| 8  | 63                       | 1.6                                                | 1.7                                               | 0.0                                                                              | 1.9                                               | 0.3                                                                              | 0.0                               | 0.1                               |
| 9  | 79                       | 2.8                                                | 2.9                                               | 0.1                                                                              | 2.3                                               | -0.4                                                                             | 0.0                               | 0.2                               |
| 10 | 77                       | 6.9                                                | 7.3                                               | 0.3                                                                              | 5.4                                               | -1.6                                                                             | 0.1                               | 2.4                               |
| 11 | 80                       | 1.1                                                | 1.4                                               | 0.4                                                                              | 2.2                                               | 1.2                                                                              | 0.1                               | 1.4                               |
| 12 | 65                       | 2.6                                                | 2.0                                               | -0.5                                                                             | 2.3                                               | -0.3                                                                             | 0.3                               | 0.1                               |
| 13 | 88                       | 6.1                                                | 5.0                                               | -1.1                                                                             | 2.6                                               | -3.5                                                                             | 1.3                               | 12.1                              |
| 14 | 94                       | 3.0                                                | 3.1                                               | 0.1                                                                              | 3.2                                               | 0.2                                                                              | 0.0                               | 0.0                               |
| 15 | 71                       | 2.0                                                | 1.4                                               | -0.6                                                                             | 2.4                                               | 0.4                                                                              | 0.3                               | 0.2                               |

predictor: %HR<sub>R</sub> ; predicted variable: BLa<sub>observed</sub> = blood lactate concentration observed during repetition test;

IV<sub>equation</sub> = individual regression equation; Δ IV<sub>equation</sub> - BLa<sub>observed</sub> = difference between predicted and observed BLa

GB<sub>equation</sub> = group-based regression equation; Δ GB<sub>equation</sub> - BLa<sub>observed</sub> = difference between predicted and observed BLa

SSD IV = sum of squared differences (individual regression); SSD GB = sum of squared differences (group-based regression)



**Prediction of blood lactate (predictor: % VO<sub>2peak</sub> = % peak oxygen consumption)**

| n  | % VO <sub>2peak</sub><br>[%] | BLa <sub>observed</sub><br>[mmol·l <sup>-1</sup> ] | IV <sub>equation</sub><br>[mmol·l <sup>-1</sup> ] | Δ IV <sub>equation</sub> -<br>BLa <sub>observed</sub><br>[mmol·l <sup>-1</sup> ] | GB <sub>equation</sub><br>[mmol·l <sup>-1</sup> ] | Δ GB <sub>equation</sub> -<br>BLa <sub>observed</sub><br>[mmol·l <sup>-1</sup> ] | SSD IV<br>[mmol·l <sup>-1</sup> ] | SSD GB<br>[mmol·l <sup>-1</sup> ] |
|----|------------------------------|----------------------------------------------------|---------------------------------------------------|----------------------------------------------------------------------------------|---------------------------------------------------|----------------------------------------------------------------------------------|-----------------------------------|-----------------------------------|
| 1  | 77                           | 1.9                                                | 1.6                                               | -0.3                                                                             | 3.2                                               | 1.3                                                                              | 0.1                               | 1.7                               |
| 2  | 73                           | 3.1                                                | 4.4                                               | 1.3                                                                              | 2.5                                               | -0.5                                                                             | 1.8                               | 0.3                               |
| 3  | 71                           | 1.3                                                | 1.8                                               | 0.5                                                                              | 2.2                                               | 0.9                                                                              | 0.2                               | 0.8                               |
| 4  | 76                           | 2.4                                                | 3.1                                               | 0.7                                                                              | 2.9                                               | 0.6                                                                              | 0.6                               | 0.3                               |
| 5  | 73                           | 0.9                                                | 0.9                                               | -0.1                                                                             | 2.5                                               | 1.5                                                                              | 0.0                               | 2.4                               |
| 6  | 78                           | 1.4                                                | 3.9                                               | 2.5                                                                              | 3.2                                               | 1.8                                                                              | 6.3                               | 3.4                               |
| 7  | 80                           | 4.6                                                | 4.3                                               | -0.3                                                                             | 3.6                                               | -1.1                                                                             | 0.1                               | 1.1                               |
| 8  | 59                           | 1.6                                                | 1.1                                               | -0.6                                                                             | 1.0                                               | -0.6                                                                             | 0.3                               | 0.4                               |
| 9  | 68                           | 2.8                                                | 2.2                                               | -0.6                                                                             | 1.8                                               | -1.0                                                                             | 0.3                               | 0.9                               |
| 10 | 89                           | 6.9                                                | 8.7                                               | 1.8                                                                              | 5.5                                               | -1.4                                                                             | 3.1                               | 2.0                               |
| 11 | 73                           | 1.1                                                | 2.8                                               | 1.7                                                                              | 2.5                                               | 1.4                                                                              | 2.9                               | 2.0                               |
| 12 | 69                           | 2.6                                                | 1.7                                               | -0.9                                                                             | 1.9                                               | -0.6                                                                             | 0.8                               | 0.4                               |
| 13 | 73                           | 6.1                                                | 4.0                                               | -2.1                                                                             | 2.4                                               | -3.7                                                                             | 4.5                               | 13.7                              |
| 14 | 82                           | 3.0                                                | 2.8                                               | -0.3                                                                             | 4.0                                               | 0.9                                                                              | 0.1                               | 0.9                               |
| 15 | 73                           | 2.0                                                | 1.3                                               | -0.7                                                                             | 2.4                                               | 0.4                                                                              | 0.5                               | 0.2                               |

predictor: %VO<sub>2peak</sub> ; predicted variable: BLa<sub>observed</sub> = blood lactate concentration observed during repetition test;

IV<sub>equation</sub> = individual regression equation; Δ IV<sub>equation</sub> - BLa<sub>observed</sub> = difference between predicted and observed BLa

GB<sub>equation</sub> = group-based regression equation; Δ GB<sub>equation</sub> - BLa<sub>observed</sub> = difference between predicted and observed BLa

SSD IV = sum of squared differences (individual regression); SSD GB = sum of squared differences (group-based regression)

**Prediction of blood lactate (predictor: % VO<sub>2R</sub> = % oxygen consumption reserve)**

| n  | % VO <sub>2R</sub><br>[%] | BLa <sub>observed</sub><br>[mmol·l <sup>-1</sup> ] | IV <sub>equation</sub><br>[mmol·l <sup>-1</sup> ] | Δ IV <sub>equation</sub> -<br>BLa <sub>observed</sub><br>[mmol·l <sup>-1</sup> ] | GB <sub>equation</sub><br>[mmol·l <sup>-1</sup> ] | Δ GB <sub>equation</sub> -<br>BLa <sub>observed</sub><br>[mmol·l <sup>-1</sup> ] | SSD IV<br>[mmol·l <sup>-1</sup> ] | SSD GB<br>[mmol·l <sup>-1</sup> ] |
|----|---------------------------|----------------------------------------------------|---------------------------------------------------|----------------------------------------------------------------------------------|---------------------------------------------------|----------------------------------------------------------------------------------|-----------------------------------|-----------------------------------|
| 1  | 72                        | 1.9                                                | 1.6                                               | -0.3                                                                             | 2.8                                               | 0.9                                                                              | 0.1                               | 0.8                               |
| 2  | 69                        | 3.1                                                | 4.4                                               | 1.3                                                                              | 2.4                                               | -0.7                                                                             | 1.8                               | 0.5                               |
| 3  | 69                        | 1.3                                                | 1.8                                               | 0.5                                                                              | 2.3                                               | 1.0                                                                              | 0.2                               | 1.0                               |
| 4  | 72                        | 2.4                                                | 3.1                                               | 0.7                                                                              | 2.7                                               | 0.3                                                                              | 0.6                               | 0.1                               |
| 5  | 70                        | 0.9                                                | 0.9                                               | -0.1                                                                             | 2.4                                               | 1.5                                                                              | 0.0                               | 2.2                               |
| 6  | 75                        | 1.4                                                | 3.9                                               | 2.5                                                                              | 3.2                                               | 1.8                                                                              | 6.3                               | 3.3                               |
| 7  | 77                        | 4.6                                                | 4.3                                               | -0.3                                                                             | 3.5                                               | -1.1                                                                             | 0.1                               | 1.2                               |
| 8  | 55                        | 1.6                                                | 1.1                                               | -0.6                                                                             | 1.1                                               | -0.5                                                                             | 0.3                               | 0.2                               |
| 9  | 63                        | 2.8                                                | 2.2                                               | -0.6                                                                             | 1.7                                               | -1.0                                                                             | 0.3                               | 1.1                               |
| 10 | 88                        | 6.9                                                | 8.7                                               | 1.8                                                                              | 5.4                                               | -1.5                                                                             | 3.1                               | 2.2                               |
| 11 | 71                        | 1.1                                                | 2.8                                               | 1.7                                                                              | 2.6                                               | 1.5                                                                              | 2.9                               | 2.2                               |
| 12 | 65                        | 2.6                                                | 1.7                                               | -0.9                                                                             | 1.9                                               | -0.6                                                                             | 0.8                               | 0.4                               |
| 13 | 69                        | 6.1                                                | 4.0                                               | -2.1                                                                             | 4.0                                               | -2.1                                                                             | 4.5                               | 4.4                               |
| 14 | 80                        | 3.0                                                | 2.8                                               | -0.3                                                                             | 4.0                                               | 0.9                                                                              | 0.1                               | 0.9                               |
| 15 | 70                        | 2.0                                                | 1.3                                               | -0.7                                                                             | 2.5                                               | 0.5                                                                              | 0.5                               | 0.2                               |

predictor: %VO<sub>2R</sub> ; predicted variable: BLa<sub>observed</sub> = blood lactate concentration observed during repetition test;

IV<sub>equation</sub> = individual regression equation; Δ IV<sub>equation</sub> - BLa<sub>observed</sub> = difference between predicted and observed BLA

GB<sub>equation</sub> = group-based regression equation; Δ GB<sub>equation</sub> - BLa<sub>observed</sub> = difference between predicted and observed BLA

SSD IV = sum of squared differences (individual regression); SSD GB = sum of squared differences (group-based regression)

**Constant load test ( workload following IAT to confirm absence of MLSS)**

IAT = individual anaerobic threshold  
MLSS = maximum lactate steady state

| n  | workload<br>[W] | HR <sub>rest</sub><br>[bpm] | HR 10min<br>[bpm] | HR 20min<br>[bpm] | HR 30min<br>[bpm] | HR 40min<br>[bpm] | HR 50min<br>[bpm] | HR 60min<br>[bpm] | HR <sub>peak</sub><br>[bpm] | % HR <sub>max</sub><br>[%] |
|----|-----------------|-----------------------------|-------------------|-------------------|-------------------|-------------------|-------------------|-------------------|-----------------------------|----------------------------|
| 1  | 350             | 70                          | 170               | 174               | 177               |                   |                   |                   | 177                         | 96                         |
| 2  | 300             | 61                          | 170               | 183               |                   |                   |                   |                   | 183                         | 92                         |
| 3  | 300             | 68                          | 176               | 182               | 187               |                   |                   |                   | 190                         | 94                         |
| 4  | 300             | 82                          | 170               | 176               |                   |                   |                   |                   | 179                         | 96                         |
| 5  | 300             | 62                          | 163               | 169               |                   |                   |                   |                   | 169                         | 90                         |
| 6  | 350             | 63                          | 165               | 171               | 180               |                   |                   |                   | 182                         | 97                         |
| 7  | 350             | 61                          | 167               | 174               |                   |                   |                   |                   | 175                         | 97                         |
| 8  | 300             | 62                          | 167               |                   |                   |                   |                   |                   | 167                         | 89                         |
| 9  | 250             | 66                          | 180               |                   |                   |                   |                   |                   | 183                         | 97                         |
| 10 | 350             | 65                          | 179               |                   |                   |                   |                   |                   | 182                         | 100                        |
| 11 | 300             | 57                          | 174               | 175               | 185               |                   |                   |                   | 185                         | 94                         |
| 12 | 250             | 72                          | 173               |                   |                   |                   |                   |                   | 179                         | 94                         |
| 13 | 250             | 105                         | 208               |                   |                   |                   |                   |                   | 212                         | 97                         |
| 14 | 350             | 75                          | 181               |                   |                   |                   |                   |                   | 185                         | 99                         |
| 15 | 300             | 72                          | 176               | 184               | 191               |                   |                   |                   | 192                         | 101                        |

HR<sub>rest</sub> = heart rate at rest; HR 10min-60min = heart rate at respective time; HR<sub>peak</sub> = peak heart rate  
%HR<sub>max</sub> = percentage of maximum heart rate

**Constant load test ( workload following IAT to confirm absence of MLSS)**

IAT = individual anaerobic threshold  
MLSS = maximum lactate steady state

| <b>n</b> | <b>BLa<sub>rest</sub></b><br>[mmol·l <sup>-1</sup> ] | <b>BLa 10min</b><br>[mmol·l <sup>-1</sup> ] | <b>BLa 20min</b><br>[mmol·l <sup>-1</sup> ] | <b>BLa 30min</b><br>[mmol·l <sup>-1</sup> ] | <b>BLa 40min</b><br>[mmol·l <sup>-1</sup> ] | <b>BLa 50min</b><br>[mmol·l <sup>-1</sup> ] | <b>BLa 60min</b><br>[mmol·l <sup>-1</sup> ] | <b>BLa<sub>peak</sub></b><br>[mmol·l <sup>-1</sup> ] |
|----------|------------------------------------------------------|---------------------------------------------|---------------------------------------------|---------------------------------------------|---------------------------------------------|---------------------------------------------|---------------------------------------------|------------------------------------------------------|
| 1        | 0.9                                                  | 5.6                                         | 6.7                                         | 6.9                                         |                                             |                                             |                                             | 8.2                                                  |
| 2        | 0.7                                                  | 8.4                                         | 10.7                                        |                                             |                                             |                                             |                                             | 10.7                                                 |
| 3        | 0.8                                                  | 6.0                                         | 7.0                                         | 9.8                                         |                                             |                                             |                                             | 10.6                                                 |
| 4        | 0.7                                                  | 7.3                                         | 9.2                                         |                                             |                                             |                                             |                                             | 9.6                                                  |
| 5        | 0.8                                                  | 4.5                                         | 7.1                                         |                                             |                                             |                                             |                                             | 7.1                                                  |
| 6        | 0.9                                                  | 6.3                                         | 6.5                                         | 6.6                                         |                                             |                                             |                                             | 6.6                                                  |
| 7        | 1.2                                                  | 7.4                                         | 10.5                                        |                                             |                                             |                                             |                                             | 10.5                                                 |
| 8        | 1.0                                                  | 6.9                                         |                                             |                                             |                                             |                                             |                                             | 6.9                                                  |
| 9        | 1.0                                                  | 10.2                                        |                                             |                                             |                                             |                                             |                                             | 14.4                                                 |
| 10       | 1.0                                                  | 11.9                                        |                                             |                                             |                                             |                                             |                                             | 12.7                                                 |
| 11       | 0.8                                                  | 5.5                                         | 6.2                                         | 7.9                                         |                                             |                                             |                                             | 8.2                                                  |
| 12       | 0.6                                                  | 9.1                                         |                                             |                                             |                                             |                                             |                                             | 10.4                                                 |
| 13       | 1.1                                                  | 13.3                                        |                                             |                                             |                                             |                                             |                                             | 22.0                                                 |
| 14       | 1.1                                                  | 11.6                                        |                                             |                                             |                                             |                                             |                                             | 13.4                                                 |
| 15       | 0.9                                                  | 4.8                                         | 7.5                                         | 10.0                                        |                                             |                                             |                                             | 10.9                                                 |

BLa<sub>rest</sub> = blood lactate concentration at rest; BLa 10min-60min = blood lactate concentration at respective time;

BLa<sub>peak</sub> = peak blood lactate concentration

**Constant load test ( workload following IAT to confirm absence of MLSS)**

IAT = individual anaerobic threshold  
MLSS = maximum lactate steady state

| n  | VO <sub>2rest</sub><br>[ml·min <sup>-1</sup> ·kg <sup>-1</sup> ] | VO <sub>2 10min</sub><br>[ml·min <sup>-1</sup> ·kg <sup>-1</sup> ] | VO <sub>2 20min</sub><br>[ml·min <sup>-1</sup> ·kg <sup>-1</sup> ] | VO <sub>2 30min</sub><br>[ml·min <sup>-1</sup> ·kg <sup>-1</sup> ] | VO <sub>2 40min</sub><br>[ml·min <sup>-1</sup> ·kg <sup>-1</sup> ] | VO <sub>2 50min</sub><br>[ml·min <sup>-1</sup> ·kg <sup>-1</sup> ] | VO <sub>2 60min</sub><br>[ml·min <sup>-1</sup> ·kg <sup>-1</sup> ] | %VO <sub>2top</sub><br>[ml·min <sup>-1</sup> ·kg <sup>-1</sup> ] | %VO <sub>2peak</sub><br>[ml·min <sup>-1</sup> ·kg <sup>-1</sup> ] |
|----|------------------------------------------------------------------|--------------------------------------------------------------------|--------------------------------------------------------------------|--------------------------------------------------------------------|--------------------------------------------------------------------|--------------------------------------------------------------------|--------------------------------------------------------------------|------------------------------------------------------------------|-------------------------------------------------------------------|
| 1  | 9.1                                                              | 60.8                                                               | 65.8                                                               | 57.8                                                               |                                                                    |                                                                    |                                                                    | 65.8                                                             | 97.6                                                              |
| 2  | 5.0                                                              | 44.2                                                               | 39.9                                                               |                                                                    |                                                                    |                                                                    |                                                                    | 44.2                                                             | 78.9                                                              |
| 3  | 9.7                                                              | 54.0                                                               | 55.4                                                               | 53.1                                                               |                                                                    |                                                                    |                                                                    | 55.4                                                             | 77.5                                                              |
| 4  | 8.7                                                              | 52.1                                                               | 45.6                                                               |                                                                    |                                                                    |                                                                    |                                                                    | 45.6                                                             | 76.8                                                              |
| 5  | 9.1                                                              | 60.5                                                               | 60.7                                                               |                                                                    |                                                                    |                                                                    |                                                                    | 60.7                                                             | 93.4                                                              |
| 6  | 5.9                                                              | 58.2                                                               | 58.9                                                               | 57.0                                                               |                                                                    |                                                                    |                                                                    | 58.9                                                             | 87.9                                                              |
| 7  | 6.4                                                              | 64.7                                                               | 65.7                                                               |                                                                    |                                                                    |                                                                    |                                                                    | 65.7                                                             | 98.8                                                              |
| 8  | 7.2                                                              | 62.0                                                               |                                                                    |                                                                    |                                                                    |                                                                    |                                                                    | 62.0                                                             | 81.6                                                              |
| 9  | 7.9                                                              | 57.6                                                               |                                                                    |                                                                    |                                                                    |                                                                    |                                                                    | 57.6                                                             | 85.1                                                              |
| 10 | 7.6                                                              | 64.5                                                               |                                                                    |                                                                    |                                                                    |                                                                    |                                                                    | 64.5                                                             | 95.3                                                              |
| 11 | 7.8                                                              | 68.2                                                               | 66.0                                                               | 67.4                                                               |                                                                    |                                                                    |                                                                    | 68.2                                                             | 85.4                                                              |
| 12 | 8.9                                                              | 54.8                                                               |                                                                    |                                                                    |                                                                    |                                                                    |                                                                    | 54.8                                                             | 90.1                                                              |
| 13 | 4.9                                                              | 52.2                                                               |                                                                    |                                                                    |                                                                    |                                                                    |                                                                    | 52.2                                                             | 92.1                                                              |
| 14 | 7.3                                                              | 71.1                                                               |                                                                    |                                                                    |                                                                    |                                                                    |                                                                    | 71.1                                                             | 96.9                                                              |
| 15 | 6.8                                                              | 57.7                                                               | 58.3                                                               | 58.8                                                               |                                                                    |                                                                    |                                                                    | 58.8                                                             | 86.0                                                              |

VO<sub>2rest</sub> = oxygen consumption at rest; VO<sub>2 10min-60min</sub> = oxygen consumption at respective time;  
VO<sub>2top</sub> = highest oxygen consumption; %VO<sub>2peak</sub> = percentage of peak oxygen consumption
